# Supplementary material for: Three-dimensional graphene-supported nickel disulfide nanoparticles promise stable and fast potassium storage
Source: Royal Society of Chemistry journal article supplement (doi:10.1039/d0nr01274b), 2020-01-01
Supplement: d0nr01274b1.pdf [file d0nr01274b1.pdf]

## Three-Dimensional Graphene-Supported Nickel Disulfide Nanoparticles

### Promise Stable and Fast Potassium Storage

Kang Han, Jiashen Meng, Xufeng Hong, Xuanpeng Wang\* and Liqiang Mai\*

K. Han, J. Meng, X. Hong

School of Materials Science and Engineering, State Key Laboratory of Advanced Technology for Materials Synthesis and Processing, Wuhan University of Technology  
122 Luoshi Road, Wuhan, 430070, Hubei, China

Dr. X. Wang

Department of Physical Science & Technology, School of Science, Wuhan University of Technology

122 Luoshi Road, Wuhan, 430070, Hubei, China

\*E-mail: wxp122525691@whut.edu.cn

Prof. L. Mai

School of Materials Science and Engineering, State Key Laboratory of Advanced Technology for Materials Synthesis and Processing, Wuhan University of Technology  
122 Luoshi Road, Wuhan, 430070, Hubei, China

\*E-mail: mlq518@whut.edu.cn

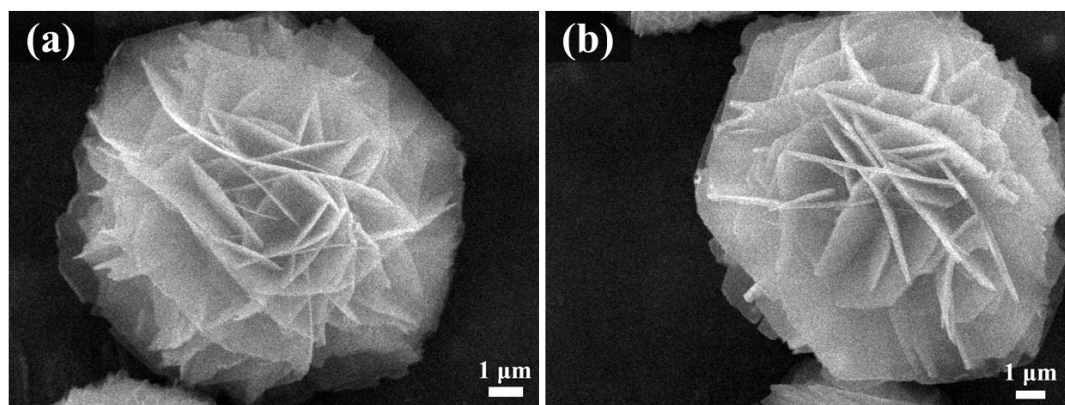

Figure S1. SEM images of nickel-based precursors; a) 6h, b)8h.

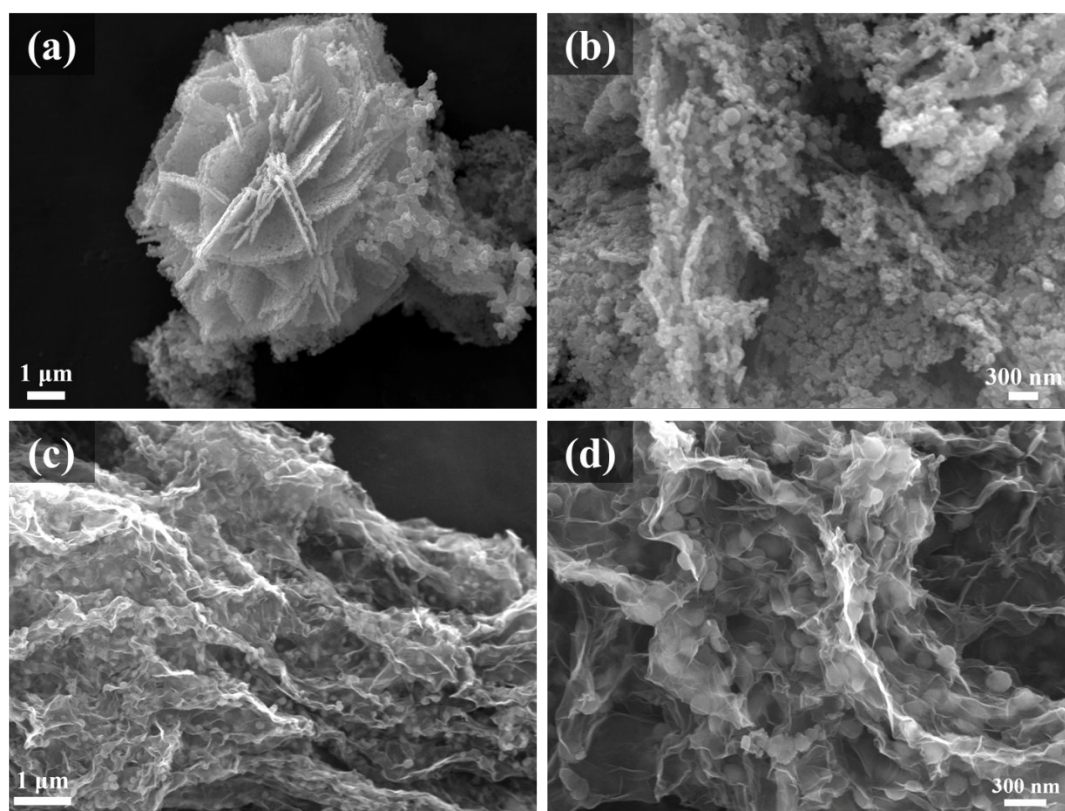

Figure S2. SEM images of a-b) NiS<sub>2</sub> microflowers and c-d) NiS<sub>2</sub>/3DGO

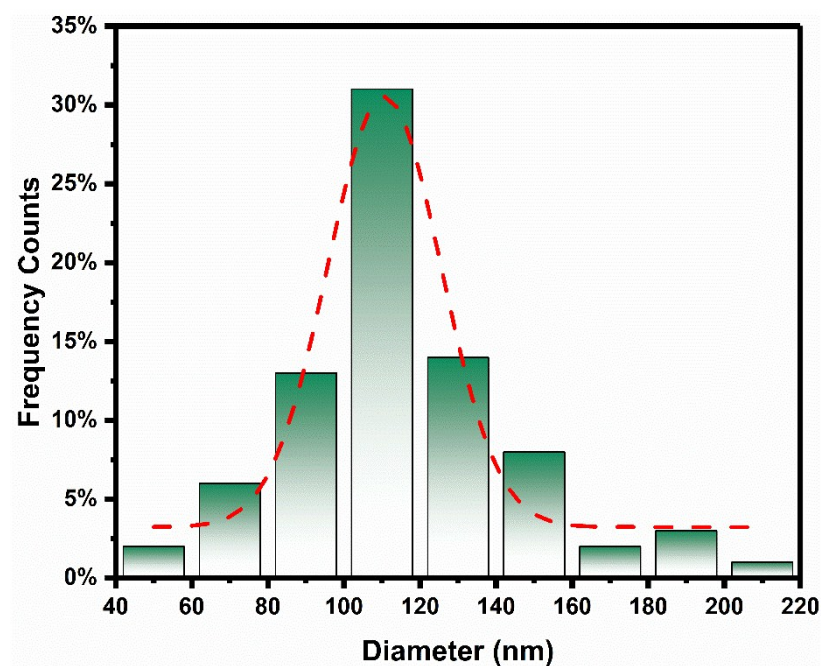

Figure S3. The particle-size distribution (PSD) of the NiS<sub>2</sub>/3DGO

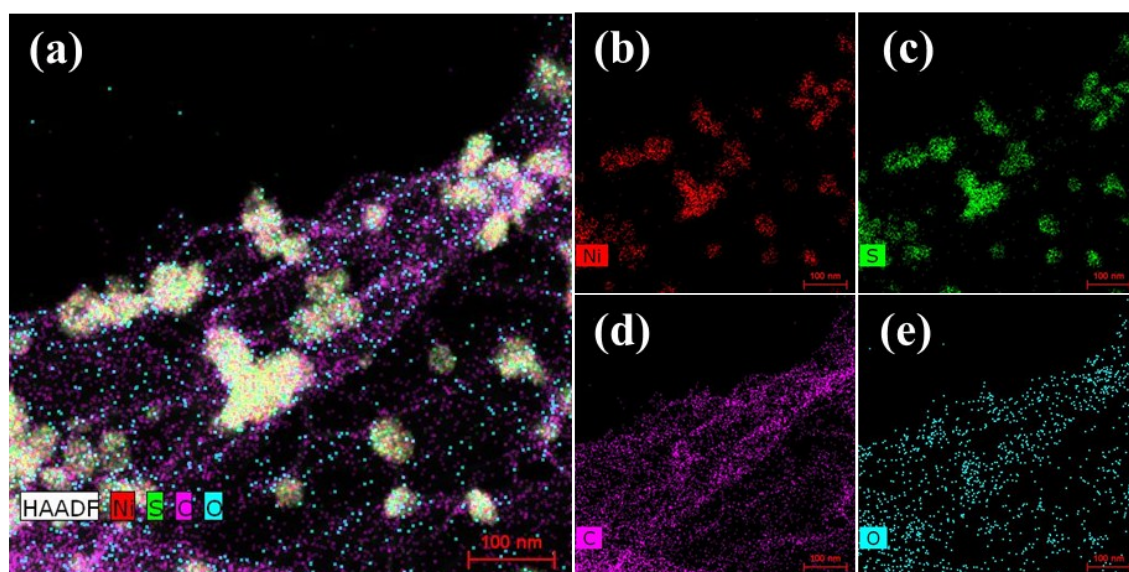

Figure S4. HAADF-STEM image of a) NiS<sub>2</sub>/3DGO with EDS-mapping of b) Ni, c) S, d) C and e) O.

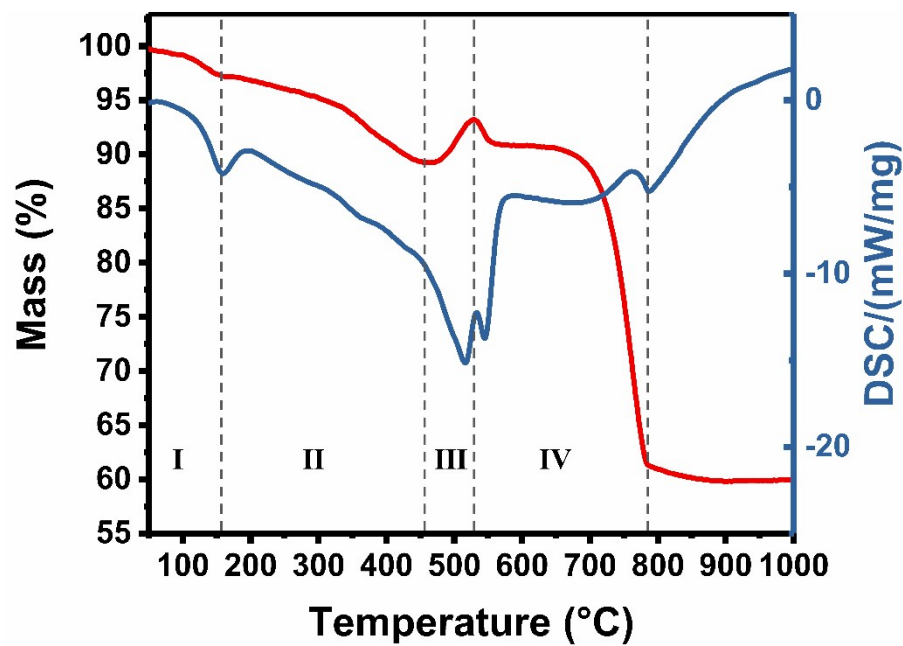

Figure S5. TG/ DSC curves of  $\text{NiS}_2/3\text{DGO}$ .

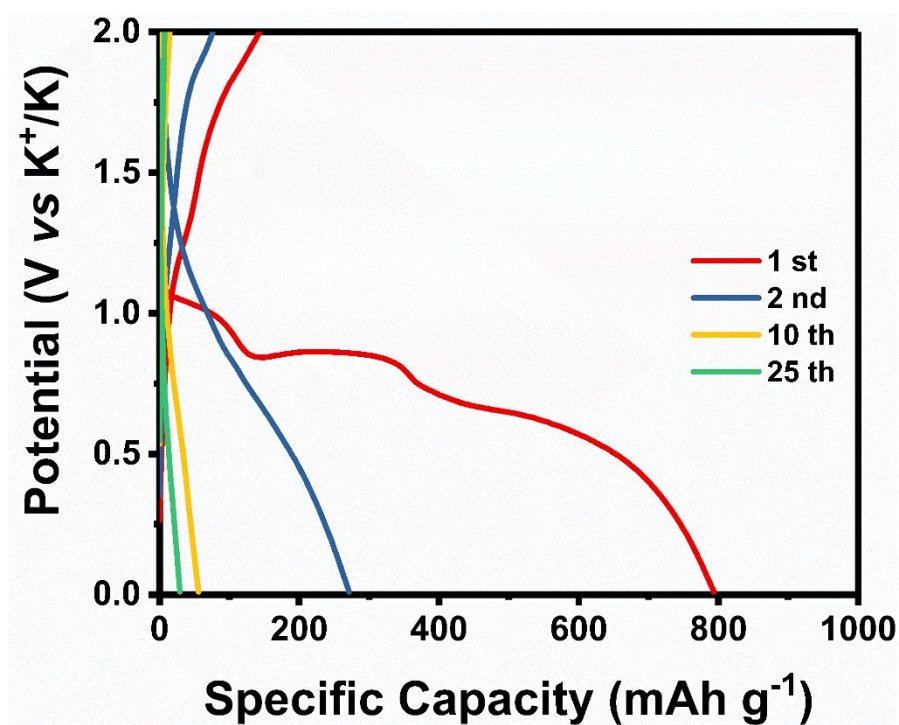

Figure S6. Representative galvanostatic charge-discharge curves of  $\text{NiS}_2$  microflowers at  $50 \text{ mA g}^{-1}$ .

**Table S1. Electrochemical performance comparison of various K-ion anodes.**

| Anode<br>Materials                 | Current Density<br>(mA g <sup>-1</sup> ) | Capacity<br>(mA h g <sup>-1</sup> ) | Cycles | Reference                                             |
|------------------------------------|------------------------------------------|-------------------------------------|--------|-------------------------------------------------------|
| SnS <sub>2</sub> -rGO              | 25                                       | 250                                 | 30     | <i>Chem. Commun.</i> , 2017,<br>53(59): 8272-8275.    |
| ReS <sub>2</sub> -N-CNFs           | 50                                       | 253                                 | 100    | <i>Nano Energy</i> 2018, 45, 346                      |
| Sn <sub>4</sub> P <sub>3</sub> /C  | 50                                       | 384                                 | 50     | <i>J. Am. Chem. Soc.</i> , 2017,<br>139(9): 3316-3319 |
| Sb <sub>2</sub> S <sub>3</sub> /C  | 50                                       | 500                                 | 50     | <i>Nat. Commun.</i> , 2018,<br>9(1): 1-10             |
| Sb <sub>2</sub> Se <sub>3</sub> @C | 50                                       | 312.8                               | 40     | <i>J. Mater. Chem. A</i> , 2019,<br>7, 12283-12291    |
| MoS <sub>2</sub> /N-C              | 50                                       | 330                                 | 50     | <i>Adv. Funct. Mater.</i> 2018,<br>1803409            |
| SnS <sub>2</sub> @C@rGO            | 100                                      | 309                                 | 100    | <i>ChemSusChem</i> , 2019,<br>12(12): 2689-2700.      |
| VSe <sub>2</sub>                   | 100                                      | 366                                 | 200    | <i>Adv. Mater.</i> 2017, 29, 1702061                  |
| NiS <sub>2</sub> @C@C              | 50                                       | 302.7                               | 100    | <i>Adv. Funct. Mater.</i> 2019,<br>1903454            |
| NiS <sub>2</sub> /3DGO             | 50                                       | 451                                 | 50     | <b>This Work</b>                                      |

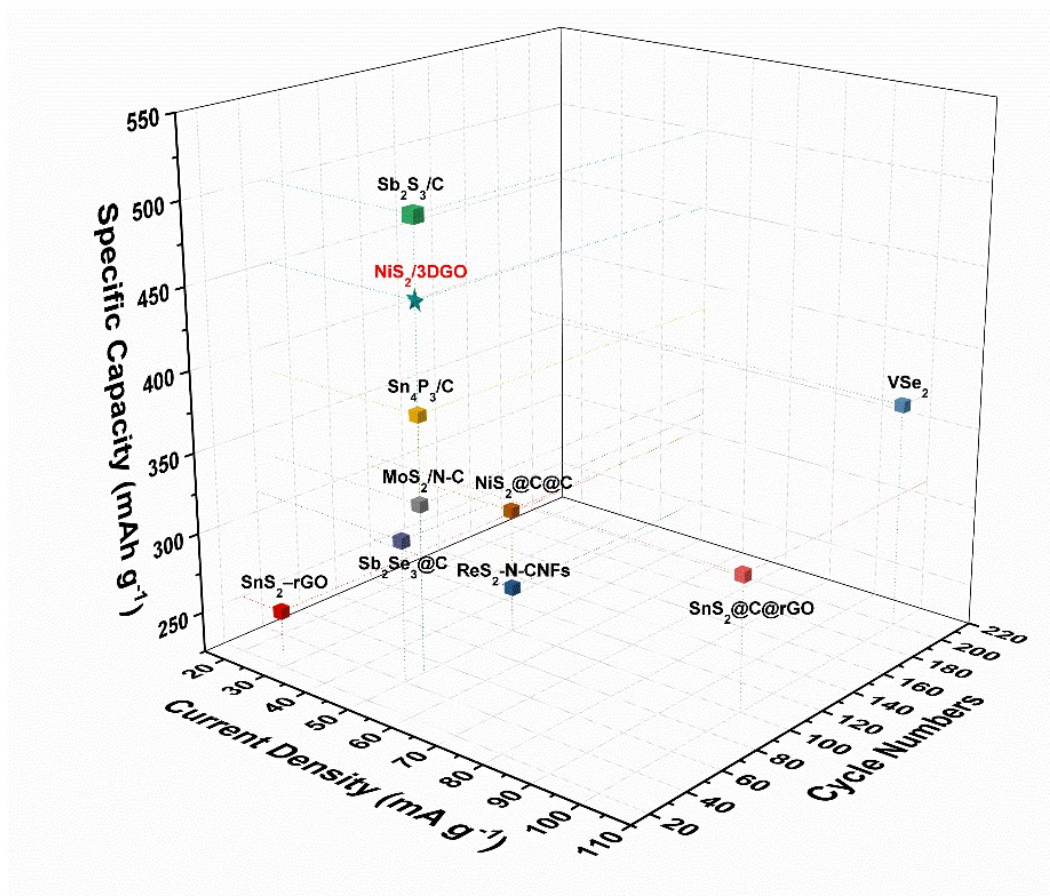

Figure S7. Summary of recent advances on electrode materials and methodologies for PIBs.

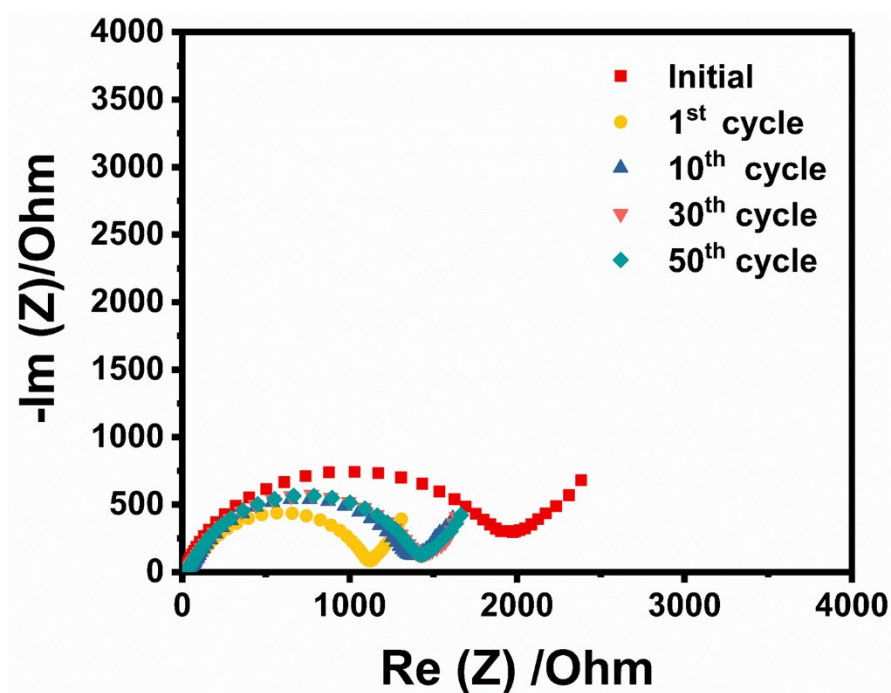

Figure S8. EIS curves after different number of cycles.

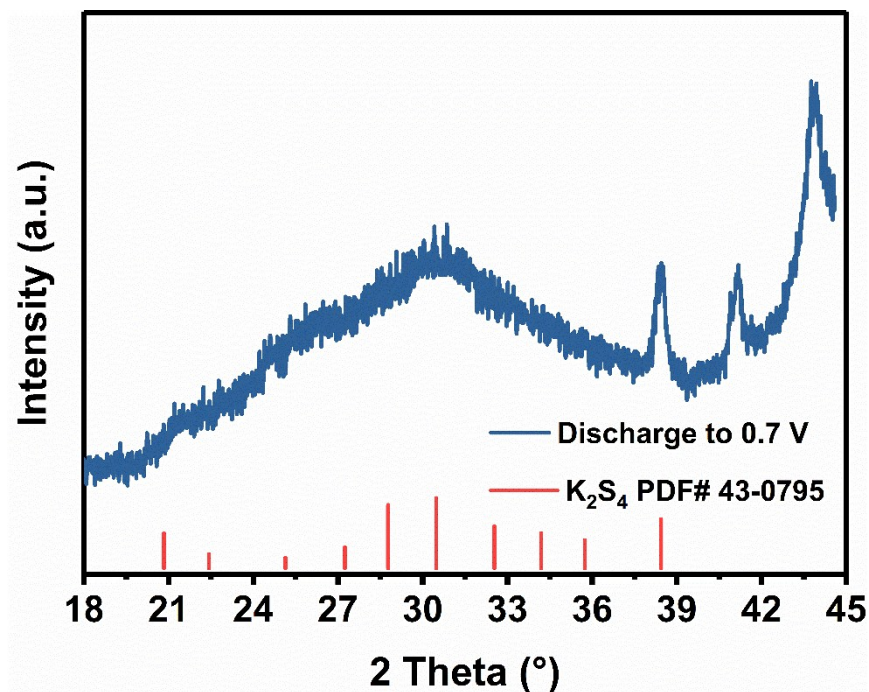

Figure S9. XRD pattern of NiS<sub>2</sub>/3DGO when discharge to 0.8V
